# Supplementary material for: Effect of Monocerin, a Fungal Secondary Metabolite, on Endothelial Cells
Source: MDPI journal article supplement (doi:10.3390/toxins15050344), 2023-05-18
Supplement: s1 [file s1]

# Supplementary Material: Effect of Monocerin, a Fungal Secondary Metabolite, on Endothelial Cells

Tainah Colombo Gomes, Rafael Conrado, Rodrigo Cardoso de Oliveira, Priscila Jane Romano Gonçalves Selari, Itamar Soares de Melo, Welington Luiz Araújo, Durvanei Augusto Maria and Ana Olívia De Souza

## Taxonomic identification of the fungus *E. rostratum*

The taxonomic identification of the fungus *E. rostratum* was based on the phylogenetic tree using the ITS-1 and 5.8S-ITS-2 sequences. The nucleotide sequence file is available from the NCBI database (GenBank accession number MK005195) (Table S1).

**Table S1.** Genbank accession number for sequences used in phylogenetic analysis.

| Species name                      | Strain                        | Genbank number |
|-----------------------------------|-------------------------------|----------------|
| <i>Alternaria infectoria</i>      | CBS 210.86                    | NR_131263.1    |
| <i>Alternaria peucedani</i>       | CNU 111485                    | NR_151840.1    |
| <i>Bipolaris brachiariae</i>      | CPC 28819                     | NR_153654.1    |
| <i>Bipolaris clavate</i>          | BRIP 12530                    | NR_147466.1    |
| <i>Bipolaris crotonis</i>         | BRIP 15875                    | NR_147468.1    |
| <i>Bipolaris secalis</i>          | BRIP 14453                    | NR_147472.1    |
| <i>Curvularia americana</i>       | UTHSC 08-3414                 | NR_146239.1    |
| <i>Curvularia hawaiiensis</i>     | BRIP 11987                    | NR_147480.1    |
| <i>Curvularia malina</i>          | CBS 131274                    | NR_147461.1    |
| <i>Curvularia micropus</i>        | CBS 127235                    | NR_157424.1    |
| <i>Curvularia nicotiae</i>        | BRIP 11983                    | NR_147483.1    |
| <i>Curvularia pseudorobusta</i>   | SDAU 992347-2                 | NR_130653.1    |
| <i>Curvularia tropicalis</i>      | BRIP 14834                    | NR_147486.1    |
| <i>Drechslera avenae</i>          | CBS 279.31                    | NR_153967.1    |
| <i>Drechslera brizae</i>          | CBS 190.29                    | NR_153992.1    |
| <i>Exserohilum fusiforme</i>      | KUC5012                       | GQ241279.1     |
| <i>Exserohilum gedarefense</i>    | CBS 297.80                    | NR_155091.1    |
| <i>Exserohilum khartoumensis</i>  | CBS 132708                    | NR_157476.1    |
| <i>Exserohilum longirostratum</i> | BRIP 16078                    | LT837826.1     |
| <i>Exserohilum mcginnisii</i>     | CBS 325.87                    | KT265237.1     |
| <i>Exserohilum neoregeliae</i>    | CBS 132832                    | NR_157457.1    |
| <i>Exserohilum oryzicola</i>      | CBS 502.90                    | NR_138225.1    |
| <i>Exserohilum pedicellatum</i>   | CBS 322.64                    | NR_157425.1    |
| <i>Exserohilum protrudens</i>     | BRIP 14814                    | KJ415561.1     |
| <i>Exserohilum rostratum</i>      | JN711432.1                    | ITF0706-2      |
| <i>Pleospora gigaspora</i>        | EGS37-017                     | AY329177.1     |
| <i>Pleospora rosae</i>            | MFLU 16-0254                  | NR_157531.1    |
| <i>Pyrenophora semeniperda</i>    | haplotype L (no strain given) | GQ168738.1     |

From the *E. rostratum* IAL 7247 culture, the secondary metabolite monocerin was obtained, purified and physical-chemically characterized. Figure S2 shows the GC-MS spectrum for this compound.

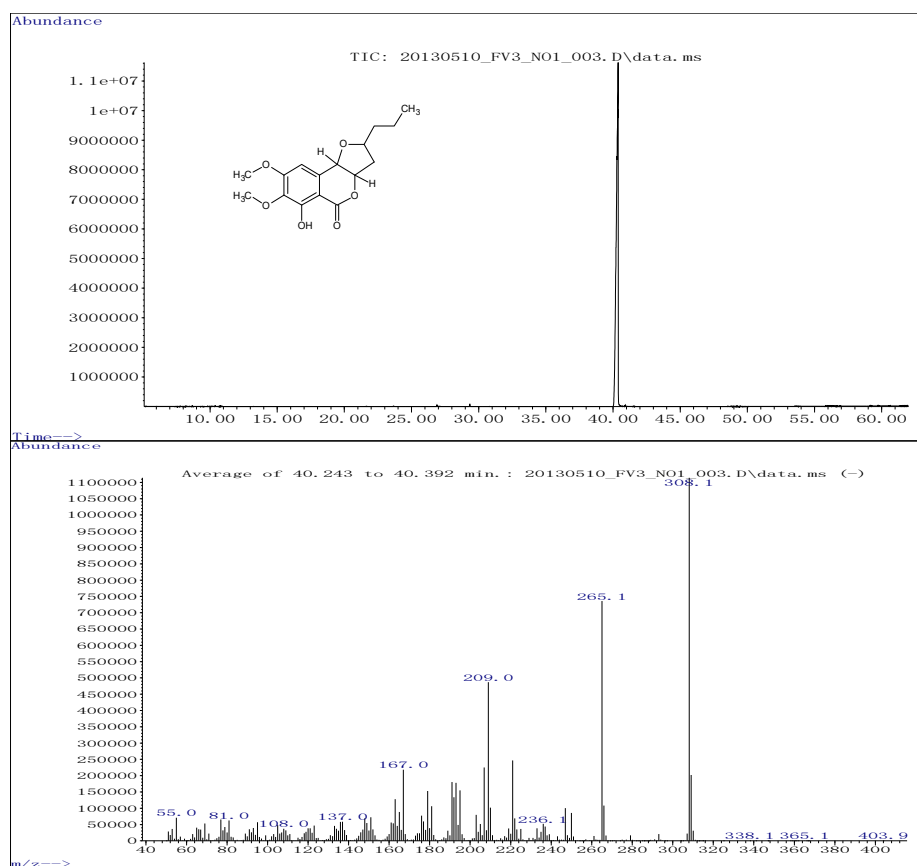

**Figure S1.** Profile of the monocerin (2S,3aR,9bR)-6-hydroxy-7,8-dimethoxy-2-propyl-2,3,3a,9b-tetrahydro-5H-furo [3,2-c]isochromen-5-one spectrum by gas chromatography-mass spectrometry (GC/MS, Agilent 7890/5975C).
